# Supplementary material
Source: MDPI journal article supplement (https://www.mdpi.com/2071-1050/10/10/3742)
Supplement: s1 [file s1]

## Supplementary material

### Environmental-economic analysis of integrated organic waste and wastewater management systems: a case study from Aarhus City (Denmark)

Marianne Thomsen <sup>1,\*</sup>, Daina Romeo <sup>1</sup>, Dario Caro <sup>1</sup>, Michele Seghetta <sup>2</sup> and Rong-Gang Cong <sup>1</sup>

<sup>1</sup> Department of Environmental Science, Aarhus University, Frederiksborgvej 399, DK-4000 Roskilde, Denmark; daina.romeo@envs.au.dk (D.R.); dac@envs.au.dk (D.C.); rc@envs.au.dk (R.-G.C.)

<sup>2</sup> Centre for Environment and Agricultural Informatics, Cranfield University, College Rd, Wharley End, Bedford MK43 0AL, UK; M.Seghetta@cranfield.ac.uk

\* Correspondence: mth@envs.au.dk; Tel.: +45-22292627

Table S1 shows the inventory for the Waste-to-Energy (WtE) plant and the two waste water treatment plants (WWTP) considered in the study. The WtE material and energy consumption are based on Vestforbrænding WtE plant in Copenhagen Municipality (Vestforbrænding green accounts, 2011). The emission resulting from the combustion process is based on average Danish domestic waste composition. The procedure for the distribution of the emissions among the different waste fractions is described in detail in [11].

**Table S1.** System level Life Cycle Inventory. The values reported refer to all the waste (commercial and domestic) combusted in the WtE and all the wastewater treated in the two WWTPs according to the scenarios.

| Item                                                | REF     | AS1     | AS2a    | AS2b    | U.M.           |
|-----------------------------------------------------|---------|---------|---------|---------|----------------|
| <i>Incineration process</i>                         |         |         |         |         |                |
| D-OF combusted                                      | 28,527  | 24,052  | 24,052  | 0       | ton DW         |
| D-IF combusted                                      | 27,408  | 27,408  | 27,408  | 27,408  | ton DW         |
| C-OF combusted                                      | 41,855  | 41,855  | 41,855  | 41,855  | ton DW         |
| C-IF combusted                                      | 40,214  | 40,214  | 40,214  | 40,214  | ton DW         |
| Total waste combusted                               | 138,004 | 133,529 | 133,529 | 109,477 | ton DW         |
| <i>Material and energy consumption</i>              |         |         |         |         |                |
| Biofuel                                             | 154     | 149     | 149     | 122     | ton            |
| Emergency diesel                                    | 1,927   | 1,865   | 1,865   | 1,529   | L              |
| Electricity consumption                             | 19,910  | 19,460  | 19,460  | 17,041  | MWh            |
| Heat consumption                                    | 1,725   | 1,686   | 1,686   | 1,476   | MWh            |
| Tap water                                           | 44,966  | 43,508  | 43,508  | 35,671  | m <sup>3</sup> |
| Calcium carbonate (CaCO <sub>3</sub> )              | 2,070   | 2,003   | 2,003   | 1,642   | ton            |
| Sodium hydroxide (NaOH)                             | 166     | 161     | 161     | 132     | ton            |
| Ferric chloride                                     | 7       | 7       | 7       | 6       | ton            |
| Trimercaptotriazin                                  | 6       | 5       | 5       | 4       | ton            |
| NH <sub>3</sub> (24%) for NO <sub>x</sub> abatement | 485     | 470     | 470     | 385     | ton            |
| <i>Air emissions</i>                                |         |         |         |         |                |
| CO <sub>2</sub> fossil share                        | 92,153  | 92,020  | 92,020  | 91,308  | ton            |
| CO <sub>2</sub> biogenic share                      | 187,046 | 178,537 | 178,537 | 132,801 | ton            |
| TOC                                                 | 0.35    | 0.34    | 0.34    | 0.28    | ton            |
| TSP                                                 | 0.58    | 0.56    | 0.56    | 0.46    | ton            |
| HCl                                                 | 6.8     | 6.6     | 6.6     | 5.4     | ton            |
| HF                                                  | 136     | 132     | 132     | 108     | kg             |
| SO <sub>2</sub>                                     | 11      | 11      | 11      | 9       | ton            |

|                                                   |           |           |           |            |                |
|---------------------------------------------------|-----------|-----------|-----------|------------|----------------|
| NO <sub>x</sub>                                   | 209       | 202       | 202       | 166        | ton            |
| Hg                                                | 1.35      | 1.35      | 1.35      | 1.34       | kg             |
| Cu                                                | 0.94      | 0.94      | 0.94      | 0.92       | kg             |
| Pb                                                | 3.99      | 3.99      | 3.99      | 3.98       | kg             |
| As                                                | 0.43      | 0.43      | 0.43      | 0.42       | kg             |
| Cd                                                | 0.32      | 0.32      | 0.32      | 0.32       | kg             |
| Cr                                                | 1.13      | 1.12      | 1.12      | 1.10       | kg             |
| Ni                                                | 1.49      | 1.49      | 1.49      | 1.47       | kg             |
| Dioxin/Furans                                     | 35        | 34        | 34        | 28         | mg             |
| PM <sub>10</sub>                                  | 463       | 449       | 449       | 367        | kg             |
| PM <sub>2,5</sub>                                 | 391       | 379       | 379       | 310        | kg             |
| Se                                                | 0.80      | 0.80      | 0.80      | 0.80       | kg             |
| Zn                                                | 1.68      | 1.68      | 1.68      | 1.68       | kg             |
| Benzo(a)-pyrene                                   | 579       | 561       | 561       | 459        | g              |
| Benzo(b)-flouranthene                             | 1,229     | 1,193     | 1,193     | 975        | g              |
| Benzo(k)-flouranthene                             | 651       | 632       | 632       | 516        | g              |
| Indeno-(1,2,3-c,d)-pyrene                         | 795       | 772       | 772       | 631        | g              |
| HCB                                               | 3.11      | 3.02      | 3.02      | 2.47       | g              |
| PCB                                               | 0.08      | 0.08      | 0.08      | 0.06       | g              |
| <i>Production</i>                                 |           |           |           |            |                |
| Electricity                                       | 91,562    | 89,492    | 89,492    | 78,367     | MWh            |
| Heat                                              | 605,424   | 591,738   | 591,738   | 518,176    | MWh            |
| <b>WWTP Marselisborg</b>                          |           |           |           |            |                |
| External carbon (D-OF treated)                    | 0         | 3,356     | 3,356     | 21,395     | ton DW         |
| COD inflow - sewage                               | 19,561    | 19,561    | 19,561    | 19,561     | ton COD        |
| <i>Material and energy consumption</i>            |           |           |           |            |                |
| Water for biopulp production                      | 0         | 0         | 4,195     | 26,744     | m <sup>3</sup> |
| Water for FWD                                     | 0         | 229,317   | 0         | 0          | m <sup>3</sup> |
| Electricity (consumption)                         | 8,000,000 | 9,784,359 | 8,356,872 | 10,275,057 | kWh            |
| Electricity (consumption) for biopulp production  | 0         | 0         | 251,709   | 1,604,647  | kWh            |
| Electricity consumption for FWDs                  | 0         | 36,917    | 0         | 0          | kWh            |
| Fe                                                | 170,000   | 170,000   | 170,000   | 170,000    | kg             |
| <i>Emissions to surface water from wastewater</i> |           |           |           |            |                |
| Suspended solids                                  | 509,600   | 572,395   | 572,395   | 909,919    | kg             |
| NVOC                                              | 824,000   | 925,537   | 925,537   | 1,471,297  | kg             |
| BOD                                               | 201,600   | 226,442   | 226,442   | 359,968    | kg             |
| COD                                               | 2,432,000 | 2,731,681 | 2,731,681 | 4,342,469  | kg             |
| Total-N                                           | 223,808   | 223,987   | 224,163   | 226,074    | kg             |
| Total-P                                           | 30,000    | 33,741    | 32,180    | 33,318     | kg             |
| Lead                                              | 79        | 88        | 88        | 140        | kg             |
| Cadmium                                           | 4.3       | 4.8       | 4.8       | 7.7        | kg             |
| Copper                                            | 352       | 395       | 395       | 629        | kg             |
| Chrome                                            | 78        | 88        | 88        | 139        | kg             |
| Mercury                                           | 5.7       | 6.4       | 6.4       | 10.1       | kg             |
| Nickel                                            | 246       | 277       | 277       | 440        | kg             |
| Zinc                                              | 3,760     | 4,223     | 4,223     | 6,714      | kg             |
| <i>Emissions to soil from sludge application</i>  |           |           |           |            |                |
| Lead                                              | 261,998   | 471,719   | 510,677   | 1,847,326  | g              |
| Cadmium                                           | 5,326     | 6,844     | 7,636     | 20,051     | g              |
| Copper                                            | 1,314,285 | 1,678,337 | 1,873,767 | 4,880,984  | g              |
| Mercury                                           | 7,710     | 9,431     | 10,578    | 25,994     | g              |
| Nickel                                            | 123,268   | 162,376   | 180,706   | 489,434    | g              |
| Zinc                                              | 5,390,286 | 6,595,845 | 7,397,362 | 18,185,398 | g              |
| Total N                                           | 288,225   | 303,832   | 400,091   | 832,059    | kg             |
| Total P                                           | 450,000   | 506,108   | 507,668   | 828,217    | kg             |
| NPE-NP1EO+NP2EO+NP                                | 13,035    | 15,943    | 17,881    | 43,928     | g              |

|                                                   |           |           |           |           |                     |
|---------------------------------------------------|-----------|-----------|-----------|-----------|---------------------|
| <i>Emissions to air</i>                           |           |           |           |           |                     |
| CH <sub>4</sub>                                   | 24.4      | 29.8      | 33.5      | 82.2      | ton                 |
| N <sub>2</sub> O, indirect                        | 1.8       | 1.8       | 1.8       | 1.8       | ton                 |
| N <sub>2</sub> O, direct                          | 10.6      | 11.2      | 10.7      | 10.7      | ton                 |
| C soil stock after 100 years                      | 776       | 949       | 1,064     | 2,614     | ton CO <sub>2</sub> |
| <i>Production</i>                                 |           |           |           |           |                     |
| Electricity                                       | 9,898     | 12,106    | 13,577    | 33,355    | MWh                 |
| Heat                                              | 10,690    | 13,075    | 14,664    | 36,025    | MWh                 |
| Avoided fertilizer P                              | 427,500   | 480,803   | 482,285   | 786,806   | kg                  |
| Avoided fertilizer N                              | 181,582   | 191,414   | 252,057   | 524,197   | kg                  |
| <b>WWTP Egaa</b>                                  |           |           |           |           |                     |
| External carbon (D-OF treated)                    | 0         | 1,119     | 1,119     | 7,132     | ton DW              |
| COD inflow - sewage                               | 5,950     | 5,950     | 5,950     | 5,950     | ton COD             |
| <i>Material and energy consumption</i>            |           |           |           |           |                     |
| Water for biopulp production                      | 0         | 0         | 1,398     | 8,915     | m <sup>3</sup>      |
| Water for FWD                                     | 0         | 76,439    | 0         | 0         | m <sup>3</sup>      |
| Electricity (consumption)                         | 2,300,000 | 2,862,184 | 2,412,437 | 3,016,785 | kWh                 |
| Electricity (consumption) for biopulp production  | 0         | 0         | 83,903    | 534,882   | kWh                 |
| Electricity consumption for FWDs                  | 0         | 12,306    | 0         | 0         | kWh                 |
| Fe                                                | 150,000   | 150,000   | 150,000   | 150,000   | kg                  |
| <i>Emissions to surface water from wastewater</i> |           |           |           |           |                     |
| Suspended solids                                  | 63,987    | 79,627    | 79,627    | 163,694   | kg                  |
| NVOC                                              | 103,464   | 128,754   | 128,754   | 264,686   | kg                  |
| BOD                                               | 25,314    | 31,501    | 31,501    | 64,758    | kg                  |
| COD                                               | 305,371   | 380,012   | 380,012   | 781,208   | kg                  |
| Total-N                                           | 58,376    | 58,436    | 58,495    | 59,131    | kg                  |
| Total-P                                           | 4,824     | 7,318     | 6,655     | 7,034     | kg                  |
| Lead                                              | 10        | 12        | 12        | 25        | kg                  |
| Cadmium                                           | 0.5       | 0.7       | 0.7       | 1.4       | kg                  |
| Copper                                            | 44        | 55        | 55        | 113       | kg                  |
| Chrome                                            | 10        | 12        | 12        | 25        | kg                  |
| Mercury                                           | 0.7       | 0.9       | 0.9       | 1.8       | kg                  |
| Nickel                                            | 31        | 39        | 39        | 79        | kg                  |
| Zinc                                              | 472       | 588       | 588       | 1,208     | kg                  |
| <i>Emissions to soil from sludge application</i>  |           |           |           |           |                     |
| Lead                                              | 28,500    | 85,894    | 88,880    | 413,420   | g                   |
| Cadmium                                           | 1,090     | 1,466     | 1,581     | 4,218     | g                   |
| Copper                                            | 425,000   | 552,518   | 597,039   | 1,521,747 | g                   |
| Mercury                                           | 940       | 1,170     | 1,269     | 3,037     | g                   |
| Nickel                                            | 27,800    | 38,466    | 41,379    | 114,364   | g                   |
| Zinc                                              | 938,000   | 1,168,368 | 1,266,628 | 3,033,004 | g                   |
| Total N                                           | 75,178    | 80,381    | 110,183   | 254,172   | kg                  |
| Total P                                           | 72,360    | 109,766   | 110,429   | 217,278   | kg                  |
| NPE-NP1EO+NP2EO+NP                                | 690       | 859       | 931       | 2,226     | g                   |
| <i>Emissions to air</i>                           |           |           |           |           |                     |
| CH <sub>4</sub>                                   | 10.7      | 13.3      | 14.4      | 34.4      | ton                 |
| N <sub>2</sub> O, indirect                        | 0.5       | 0.5       | 0.5       | 0.5       | ton                 |
| N <sub>2</sub> O, direct                          | 2.8       | 3.0       | 2.8       | 2.8       | ton                 |
| C soil stock after 100 years                      | 162       | 202       | 219       | 523       | ton CO <sub>2</sub> |
| <i>Production</i>                                 |           |           |           |           |                     |
| Electricity                                       | 6,000     | 7,467     | 8,095     | 19,356    | MWh                 |
| Heat                                              | 3,000     | 3,733     | 4,048     | 9,678     | MWh                 |
| Avoided fertilizer P                              | 68,742    | 104,278   | 104,907   | 206,414   | kg                  |
| Avoided fertilizer N                              | 47,362    | 50,640    | 69,415    | 160,129   | kg                  |
| <i>Transport</i>                                  |           |           |           |           |                     |

|                                 |         |         |         |         |                |
|---------------------------------|---------|---------|---------|---------|----------------|
| Aarhus-Incinerator              | 532,923 | 449,327 | 449,327 | 0       | tkm            |
| Aarhus-Marselisborg             | 0       | 59,009  | 59,009  | 376,181 | tkm            |
| Aarhus-Egaa                     | 0       | 8,605   | 8,605   | 54,860  | tkm            |
| <i>Spreading of sludge</i>      |         |         |         |         |                |
| Spreading by vacuum tanker      |         |         |         |         |                |
| Marselisborg                    | 17,629  | 21,561  | 24,182  | 59,407  | m <sup>3</sup> |
| Spreading by vacuum tanker Egaa | 3,683   | 4,583   | 4,969   | 11,881  | m <sup>3</sup> |

**Table S2.** Input-output inventory for the two wastewater treatment plants included in the waste and wastewater management systems.

| Input-Output parameters                                         | UM             | Marselisborg<br>- RS | Egaa - RS | Marselisborg<br>2026 - AS1 | Egaa – AS1 | Marselisborg<br>2026 –AS2 | Egaa – AS2 |
|-----------------------------------------------------------------|----------------|----------------------|-----------|----------------------------|------------|---------------------------|------------|
| Influent wastewater load <sup>1</sup>                           | PE             | 400,000              | 120,000   | 400,000                    | 120,000    | 400,000                   | 120,000    |
| Influent wastewater capacity <sup>1</sup>                       | PE             | 480,000              | 120,000   | 480,000                    | 120,000    | 480,000                   | 120,000    |
| <b>Input (year)</b>                                             |                |                      |           |                            |            |                           |            |
| Wastewater input <sup>1</sup>                                   | m <sup>3</sup> | 20,000,000           | 8,370,910 | 20,000,000                 | 8,370,910  | 20,000,000                | 8,370,910  |
| Water for biopulp production <sup>2</sup>                       | m <sup>3</sup> | -                    | -         | -                          | -          | 4,195                     | 1,398      |
| Water for FWD <sup>3</sup>                                      | m <sup>3</sup> | -                    | -         | 229,317                    | 76,439     | -                         | -          |
| Electricity (consumption) <sup>4</sup>                          | kWh            | 8,000,000            | 2,300,000 | 9,784,359                  | 2,862,184  | 8,356,872                 | 2,412,437  |
| Electricity (consumption) for biopulp production <sup>2</sup>   | kWh            | -                    | -         | -                          | -          | 251,709                   | 83,903     |
| Electricity consumption for FWDs <sup>3</sup>                   | kWh            | -                    | -         | 36917,4                    | 12305,8    | -                         | -          |
| Fe <sup>1</sup>                                                 | kg             | 170,000              | 150,000   | 170,000                    | 150,000    | 170,000                   | 150,000    |
| COD influent wastewater <sup>1</sup>                            | ton            | 19,561               | 5,950     | 19,561                     | 5,950      | 19,561                    | 5,950      |
| N influent wastewater <sup>1</sup>                              | ton            | 2,100                | 548       | 2,100                      | 548        | 2,100                     | 548        |
| P influent wastewater <sup>1</sup>                              | ton            | 480                  | 77        | 480                        | 97         | 480                       | 97         |
| COD influent wastewater - FWD <sup>2</sup>                      | ton            | -                    | -         | 4,363                      | 1,454      | -                         | -          |
| Nitrogen – FWD <sup>5</sup>                                     | ton            | -                    | -         | 113.7                      | 37.9       | -                         | -          |
| Phosphorous – FWD <sup>5</sup>                                  | ton            | -                    | -         | 59.8                       | 19.9       | -                         | -          |
| External carbon <sup>5</sup>                                    | ton COD        | -                    | -         | -                          | -          | 4363                      | 1454       |
| N - external carbon <sup>5</sup>                                | ton N          | -                    | -         | -                          | -          | 114                       | 38         |
| P - external carbon <sup>5</sup>                                | ton P          | -                    | -         | -                          | -          | 60                        | 20         |
| COD in the ingestate <sup>6</sup>                               | ton COD        | 11,737               | 4,165     | 14,354                     | 5,183      | 16,100                    | 5,619      |
| <b>Output</b>                                                   |                |                      |           |                            |            |                           |            |
| Electricity <sup>7</sup>                                        | MWh            | 9,898                | 6,000     | 12,106                     | 7,467      | 13,577                    | 8,095      |
| Heat <sup>7</sup>                                               | MWh            | 10,690               | 3,000     | 13,075                     | 3,733      | 14,664                    | 4,048      |
| <b>Final digestate</b>                                          |                |                      |           |                            |            |                           |            |
| Digestate production <sup>8</sup>                               | ton COD        | 4,231                | 884       | 5,175                      | 1,100      | 5,804                     | 1,193      |
| Avoided fertilizer P <sup>9</sup>                               | ton            | 428                  | 69        | 481                        | 104        | 482                       | 105        |
| Avoided fertilizer N <sup>9</sup>                               | ton            | 182                  | 47        | 191                        | 51         | 252                       | 69         |
| Rejectwater <sup>10</sup>                                       | ton COD        | 168                  | 60        | 206                        | 74         | 231                       | 81         |
| Rejectwater <sup>10</sup>                                       | ton N          | 32                   | 8         | 33                         | 9          | 35                        | 9          |
| Rejectwater <sup>10</sup>                                       | ton P          | 39                   | 6         | 44                         | 10         | 43                        | 9          |
| <b>Emission into surface water from wastewater<sup>11</sup></b> |                |                      |           |                            |            |                           |            |
| Suspended solids                                                | kg             | 5.10E+05             | 6.40E+04  | 5.72E+05                   | 7.96E+04   | 5.72E+05                  | 7.96E+04   |
| NVOC                                                            | kg             | 8.24E+05             | 1.03E+05  | 9.26E+05                   | 1.29E+05   | 9.26E+05                  | 1.29E+05   |
| BOD                                                             | kg             | 2.02E+05             | 2.53E+04  | 2.26E+05                   | 3.15E+04   | 2.26E+05                  | 3.15E+04   |
| COD                                                             | kg             | 2.43E+06             | 3.05E+05  | 2.73E+06                   | 3.80E+05   | 2.73E+06                  | 3.80E+05   |
| NH <sub>x</sub> -N                                              | kg             | 4.35E+04             | 5.46E+03  | 4.89E+04                   | 6.80E+03   | 4.89E+04                  | 6.80E+03   |
| Nitrites +nitrates-N                                            | kg             | 1.62E+05             | 2.03E+04  | 1.82E+05                   | 2.53E+04   | 1.82E+05                  | 2.53E+04   |
| Total-N                                                         | kg             | 2.24E+05             | 5.84E+04  | 2.24E+05                   | 5.84E+04   | 2.24E+05                  | 5.85E+04   |
| Total-P                                                         | kg             | 30,000               | 4,824     | 33,741                     | 7,318      | 32,180                    | 6,655      |
| Lead                                                            | kg             | 7.86E+01             | 9.86E+00  | 8.82E+01                   | 1.23E+01   | 8.82E+01                  | 1.23E+01   |

|                                                            |       |          |          |          |          |          |          |
|------------------------------------------------------------|-------|----------|----------|----------|----------|----------|----------|
| Cadmium                                                    | kg    | 4.29E+00 | 5.38E-01 | 4.82E+00 | 6.70E-01 | 4.82E+00 | 6.70E-01 |
| Copper                                                     | kg    | 3.52E+02 | 4.42E+01 | 3.95E+02 | 5.50E+01 | 3.95E+02 | 5.50E+01 |
| Chrome                                                     | kg    | 7.81E+01 | 9.80E+00 | 8.77E+01 | 1.22E+01 | 8.77E+01 | 1.22E+01 |
| Mercury                                                    | kg    | 5.66E+00 | 7.10E-01 | 6.35E+00 | 8.84E-01 | 6.35E+00 | 8.84E-01 |
| Nickel                                                     | kg    | 2.46E+02 | 3.09E+01 | 2.77E+02 | 3.85E+01 | 2.77E+02 | 3.85E+01 |
| Zinc                                                       | kg    | 3.76E+03 | 4.72E+02 | 4.22E+03 | 5.88E+02 | 4.22E+03 | 5.88E+02 |
| <b>Emission into soil from digestate<sup>11</sup></b>      |       |          |          |          |          |          |          |
| Lead                                                       | g     | 2.62E+05 | 2.85E+04 | 4.72E+05 | 8.59E+04 | 5.11E+05 | 8.89E+04 |
| Cadmium                                                    | g     | 5.33E+03 | 1.09E+03 | 6.84E+03 | 1.47E+03 | 7.64E+03 | 1.58E+03 |
| Copper                                                     | g     | 1.31E+06 | 4.25E+05 | 1.68E+06 | 5.53E+05 | 1.87E+06 | 5.97E+05 |
| Mercury                                                    | g     | 7.71E+03 | 9.40E+02 | 9.43E+03 | 1.17E+03 | 1.06E+04 | 1.27E+03 |
| Nickel                                                     | g     | 1.23E+05 | 2.78E+04 | 1.62E+05 | 3.85E+04 | 1.81E+05 | 4.14E+04 |
| Zinc                                                       | g     | 5.39E+06 | 9.38E+05 | 6.60E+06 | 1.17E+06 | 7.40E+06 | 1.27E+06 |
| Total N                                                    | kg    | 2.88E+05 | 7.52E+04 | 3.04E+05 | 8.04E+04 | 4.00E+05 | 1.10E+05 |
| Total P                                                    | kg    | 4.50E+05 | 7.24E+04 | 5.06E+05 | 1.10E+05 | 5.08E+05 | 1.10E+05 |
| NPE-NP <sub>1</sub> EO+NP <sub>2</sub> EO+NP <sup>12</sup> | g     | 1.30E+04 | 6.90E+02 | 1.59E+04 | 8.59E+02 | 1.79E+04 | 9.31E+02 |
| <b>Sludge treatment</b>                                    |       |          |          |          |          |          |          |
| C soil stock increase <sup>13</sup>                        | ton C | 212      | 44       | 259      | 55       | 290      | 60       |
| <b>Emission into air<sup>14</sup></b>                      |       |          |          |          |          |          |          |
| CH <sub>4</sub>                                            | ton   | 24.4     | 10.7     | 29.8     | 13.3     | 33.5     | 14.4     |
| N <sub>2</sub> O <sub>indirect</sub>                       | ton   | 1.76     | 0.46     | 1.76     | 0.46     | 1.76     | 0.46     |
| N <sub>2</sub> O <sub>direct</sub>                         | ton   | 10.63    | 2.77     | 11.21    | 2.97     | 10.65    | 2.78     |

<sup>1</sup>Data on wastewater loads and WWTP treatment capacity received from Aarhus Vand and in agreement with the reported COD data for 2013 adjusted for the actual PE load in the reference scenario 2026 (Nature Agency, 2015).

<sup>2</sup>Data for AS2 on biopulp production was adopted for preprocessing of the organic fraction of domestic waste collected by truck. The water and energy consumption for the production of the biopulp ingestate was taken from ECOGI technology (KomTek Miljø af 2012 A/S).

<sup>3</sup>The extra water consumption associated to the FWDs is set equal to 3.6 L/person/day (New York City DEP, 1999). One person produces 25 kg FWD COD/year (Nordic Council of Ministers, 2007).The FWD water use equals the total amount of COD received via the FWDs divided by the 25 kg COD/person/year multiplied by 0.0036 m<sup>3</sup>/person/day\*365 days/year.

<sup>4</sup>Electricity consumption for the reference scenarios was received from Aarhus Vand. For the AS1, the electricity consumption at plant level was increased proportional to the amount of COD in the influent wastewater delivered by the FWDs. For the AS2's, the extra electricity consumption per ton COD in the biopulped D-OF is increased proportional to 20% of the electricity consumption per ton COD treated at the WWTP reference scenario (Pedersen, 2013).

<sup>5</sup>The N and P content in organic household waste was obtained from Thomsen et al. (2015)

<sup>6</sup>National average assumed for centralised WWTPS with anaerobic sludge digestion equal to 60% of the influent COD (Thomsen et al., 2015; Nielsen et al., 2015). For Egaa this fraction is set equal to 70% due to the plant design including the Anammox technology prior to the aerobic biotank \*(personal communication Peter Balslev, Aarhus Vand; Thomsen et al., 2015)

<sup>7</sup>Electricity and heat production for the reference scenario was received from Aarhus Vand and upscaled according to the COD content in the ingestate in the two alternative scenarios.

<sup>8</sup>Data on the final sludge production is provided by Aarhus Vand for the reference scenario upscaled according to the extra amount of COD in the inlet wastewater and COD in organic household waste pretreated according to the ECOGI technology.

<sup>9</sup>The avoided import of mineral N and P fertilizer was set equal to the bioavailable fraction of N and P in the final sludge (Jensen et al., 2015; Seghetta et al., 2016).

<sup>10</sup>Reported by Aarhus Vand for the reference scenario and upscaled according to the content of N and P in the added organic household waste.

<sup>11,12</sup>Calculated based on heavy metal content in the ingestate and the monitored distribution between sludge and effluent wastewater.

<sup>13</sup>10% of the added carbon estimated undecomposed after 100 years (Mogensen et al., 2014; Petersen et al., 2013)

<sup>14</sup>Calculated according the Danish emission model (Thomsen et al., 2015; Nielsen et al., 2016; Thomsen 2016)

**Table S3.** Distribution of the waste categories in organic and fossil fractions<sup>1</sup>.

| <b>Organic fraction (D-OF)</b> | <b>Fossil fraction (D-IF)</b> |
|--------------------------------|-------------------------------|
| Vegetal waste                  | Carton with plastic           |
| Animal waste                   | Carton with Al foil           |
| Newsprints                     | Soft plastic                  |
| Magazines                      | Plastic bottles               |
| Advertisements                 | Other hard plastic            |
| Books and phonebooks           | Non-recyclable plastic        |
| Office paper                   | Diapers                       |
| Clean paper                    | Cotton sticks                 |
| Paper and carton containers    | Other cotton etc.             |
| Cardboard                      | Wood                          |
| Dirty paper                    | Textiles                      |
| Dirty cardboard                | Shoes, leather                |
| Kitchen tissues                | Rubber                        |
| Yard waste                     | Office articles               |
| Animal etc                     | Cigarette butts               |
|                                | Other combustibles            |
|                                | Vacuum cleaner bags           |
|                                | Clear glass                   |
|                                | Green glass                   |
|                                | Brown glass                   |
|                                | Other glass                   |
|                                | Aluminium containers          |
|                                | Aluminium foil                |
|                                | Metal like foil               |
|                                | Metal containers              |
|                                | Other of metal                |
|                                | Soil                          |
|                                | Rocks, stones and gravel      |
|                                | Ash                           |
|                                | Ceramics                      |
|                                | Cat litter                    |
|                                | Other non-combustibles        |
|                                | Batteries                     |

<sup>1</sup> Data for reference system are obtained from the Green Account (AffaldVarme Aarhus, 2014). Starting from data for reference system, data for AS1, AS2a and AS2b are allocated on the basis of total dry weight showed in Table S1.

**Table S4.** FWD installation percent based on an increase in COD in the influent of 25%.

|                                                 |         |
|-------------------------------------------------|---------|
| % FWD installation                              | 63      |
| Total number of FWDs <sup>1</sup>               | 176,260 |
| Total FWD organic matter COD [ton] <sup>2</sup> | 9,271   |
| Total organic matter COD [ton] <sup>3</sup>     | 37,085  |
| Number of persons/household <sup>4</sup>        | 2.1     |
| Number of FWDs, Egå <sup>5</sup>                | 27,649  |
| Number of FWDs, Marselisborg <sup>5</sup>       | 82,946  |
| FWD [kg COD/person/year] <sup>4</sup>           | 25      |

<sup>1</sup>Number of FWDs upon 100% installation'

<sup>2</sup>The amount of COD delivered to the sewer system upon 100% installation

<sup>3</sup>The organic fraction of organic household waste, D-OF, in units of COD; using a conversion factor of 1.3 ton COD/ton Dry weight organic household waste

<sup>4</sup>DANVA, 2011.

<sup>5</sup>Calculated from the COD amounts allocated divided by 1.2 person/household\*0.025 ton COD /person)



**Table S5** Detailed result from the LCIA of the three scenarios for the impact categories climate change (CC) in units of [kg CO2 eq.], Fossil depletion (FD) in units of [kg oil eq.], human toxicity (HT) in units of [kg 1,4-DB eq.] , Terrestrial Ecotoxicity (TE) in units of [kg 1,4-DB eq.], Freshwater Eutrophication (FE) in units of [kg P eq.], Marine Eutrophication (ME) in units of [kg N eq.].

|    |      | Transport | WtE-<br>Direct<br>emissions | WtE-<br>Material and<br>energy<br>consumption | WtE-<br>Avoided<br>heat | WtE-<br>Avoided<br>electricity | WWTP<br>Egaa-<br>Direct<br>emissions | WWTP Egaa-<br>Material and<br>energy<br>consumption | WWTP<br>Egaa-<br>Avoided<br>heat | WWTP<br>Egaa-<br>Avoided<br>electricity | WWTP<br>Egaa-<br>Avoided<br>mineral<br>fertilizers | WWTP<br>Marselisborg-<br>Direct<br>emissions | WWTP<br>Marselisborg-<br>Material and<br>energy<br>consumption | WWTP<br>Marselisborg-<br>Avoided<br>heat | WWTP<br>Marselisborg-<br>Avoided<br>electricity | WWTP<br>Marselisborg-<br>Avoided<br>mineral<br>fertilizers | Total     |
|----|------|-----------|-----------------------------|-----------------------------------------------|-------------------------|--------------------------------|--------------------------------------|-----------------------------------------------------|----------------------------------|-----------------------------------------|----------------------------------------------------|----------------------------------------------|----------------------------------------------------------------|------------------------------------------|-------------------------------------------------|------------------------------------------------------------|-----------|
| CC | REF  | 6,63E+05  | 9,22E+07                    | 8,67E+06                                      | -1,52E+08               | -3,16E+07                      | 1,07E+06                             | 9,24E+05                                            | -7,55E+05                        | -2,07E+06                               | -8,10E+05                                          | 3,53E+06                                     | 2,92E+06                                                       | -2,69E+06                                | -3,42E+06                                       | -3,71E+06                                                  | -8,74E+07 |
|    | AS1  | 5,59E+05  | 9,20E+07                    | 8,46E+06                                      | -1,49E+08               | -3,09E+07                      | 1,15E+06                             | 1,14E+06                                            | -9,39E+05                        | -2,58E+06                               | -9,75E+05                                          | 3,66E+06                                     | 3,61E+06                                                       | -3,29E+06                                | -4,18E+06                                       | -4,04E+06                                                  | -8,51E+07 |
|    | AS2a | 6,43E+05  | 9,20E+07                    | 8,46E+06                                      | -1,49E+08               | -3,09E+07                      | 1,11E+06                             | 9,93E+05                                            | -1,02E+06                        | -2,79E+06                               | -1,18E+06                                          | 3,47E+06                                     | 3,13E+06                                                       | -3,69E+06                                | -4,68E+06                                       | -4,71E+06                                                  | -8,80E+07 |
|    | AS2b | 5,36E+05  | 9,13E+07                    | 7,34E+06                                      | -1,30E+08               | -2,70E+07                      | 1,31E+06                             | 1,37E+06                                            | -2,43E+06                        | -6,68E+06                               | -2,59E+06                                          | 3,17E+06                                     | 4,29E+06                                                       | -9,06E+06                                | -1,15E+07                                       | -8,93E+06                                                  | -8,92E+07 |
| FD | REF  | 2,29E+05  | 0,00E+00                    | 2,44E+06                                      | -5,25E+07               | -8,04E+06                      | 0,00E+00                             | 2,36E+05                                            | -2,60E+05                        | -5,27E+05                               | -1,63E+05                                          | 0,00E+00                                     | 7,44E+05                                                       | -9,26E+05                                | -8,69E+05                                       | -8,33E+05                                                  | -6,04E+07 |
|    | AS1  | 1,93E+05  | 0,00E+00                    | 2,38E+06                                      | -5,13E+07               | -7,86E+06                      | 0,00E+00                             | 2,92E+05                                            | -3,24E+05                        | -6,56E+05                               | -2,12E+05                                          | 0,00E+00                                     | 9,22E+05                                                       | -1,13E+06                                | -1,06E+06                                       | -9,19E+05                                                  | -5,97E+07 |
|    | AS2a | 2,22E+05  | 0,00E+00                    | 2,38E+06                                      | -5,13E+07               | -7,86E+06                      | 0,00E+00                             | 2,53E+05                                            | -3,51E+05                        | -7,11E+05                               | -2,38E+05                                          | 0,00E+00                                     | 8,00E+05                                                       | -1,27E+06                                | -1,19E+06                                       | -1,00E+06                                                  | -6,02E+07 |
|    | AS2b | 1,85E+05  | 0,00E+00                    | 2,06E+06                                      | -4,49E+07               | -6,88E+06                      | 0,00E+00                             | 3,49E+05                                            | -8,39E+05                        | -1,70E+06                               | -5,00E+05                                          | 0,00E+00                                     | 1,10E+06                                                       | -3,12E+06                                | -2,93E+06                                       | -1,79E+06                                                  | -5,90E+07 |
| HT | REF  | 1,14E+04  | 8,40E+05                    | 2,02E+06                                      | -9,19E+06               | -7,85E+06                      | 5,88E+05                             | 2,45E+05                                            | -4,56E+04                        | -5,14E+05                               | -1,27E+06                                          | 3,45E+06                                     | 7,40E+05                                                       | -1,62E+05                                | -8,48E+05                                       | -7,80E+06                                                  | -1,98E+07 |
|    | AS1  | 9,60E+03  | 8,39E+05                    | 1,97E+06                                      | -8,99E+06               | -7,67E+06                      | 7,74E+05                             | 3,04E+05                                            | -5,67E+04                        | -6,40E+05                               | -1,91E+06                                          | 4,31E+06                                     | 9,28E+05                                                       | -1,99E+05                                | -1,04E+06                                       | -8,76E+06                                                  | -2,01E+07 |
|    | AS2a | 1,10E+04  | 8,39E+05                    | 1,97E+06                                      | -8,99E+06               | -7,67E+06                      | 8,31E+05                             | 2,62E+05                                            | -6,15E+04                        | -6,94E+05                               | -1,93E+06                                          | 4,78E+06                                     | 7,93E+05                                                       | -2,23E+05                                | -1,16E+06                                       | -8,83E+06                                                  | -2,01E+07 |
|    | AS2b | 9,21E+03  | 8,29E+05                    | 1,71E+06                                      | -7,87E+06               | -6,72E+06                      | 2,14E+06                             | 3,54E+05                                            | -1,47E+05                        | -1,66E+06                               | -3,82E+06                                          | 1,19E+07                                     | 1,08E+06                                                       | -5,47E+05                                | -2,86E+06                                       | -1,45E+07                                                  | -2,01E+07 |
| TE | REF  | 2,48E+01  | 2,07E+02                    | 1,17E+03                                      | -6,20E+03               | -3,87E+03                      | 3,94E+03                             | 1,11E+02                                            | -3,07E+01                        | -2,54E+02                               | -4,99E+03                                          | 1,64E+04                                     | 3,55E+02                                                       | -1,09E+02                                | -4,18E+02                                       | -2,78E+04                                                  | -2,14E+04 |
|    | AS1  | 2,09E+01  | 2,07E+02                    | 1,14E+03                                      | -6,06E+03               | -3,78E+03                      | 5,06E+03                             | 1,37E+02                                            | -3,82E+01                        | -3,16E+02                               | -6,95E+03                                          | 2,06E+04                                     | 4,35E+02                                                       | -1,34E+02                                | -5,12E+02                                       | -3,09E+04                                                  | -2,11E+04 |
|    | AS2a | 2,41E+01  | 2,07E+02                    | 1,14E+03                                      | -6,06E+03               | -3,78E+03                      | 5,47E+03                             | 1,20E+02                                            | -4,15E+01                        | -3,42E+02                               | -7,52E+03                                          | 2,30E+04                                     | 3,81E+02                                                       | -1,50E+02                                | -5,74E+02                                       | -3,27E+04                                                  | -2,08E+04 |
|    | AS2b | 2,01E+01  | 2,05E+02                    | 9,88E+02                                      | -5,31E+03               | -3,31E+03                      | 1,37E+04                             | 1,65E+02                                            | -9,91E+01                        | -8,18E+02                               | -1,55E+04                                          | 5,83E+04                                     | 5,22E+02                                                       | -3,69E+02                                | -1,41E+03                                       | -5,65E+04                                                  | -9,48E+03 |
| FE | REF  | 6,11E+00  | 0,00E+00                    | 2,65E+03                                      | -5,53E+03               | -1,13E+04                      | 6,71E+03                             | 3,42E+02                                            | -2,74E+01                        | -7,39E+02                               | -2,10E+03                                          | 4,17E+04                                     | 1,05E+03                                                       | -9,77E+01                                | -1,22E+03                                       | -1,30E+04                                                  | 1,85E+04  |
|    | AS1  | 5,15E+00  | 0,00E+00                    | 2,58E+03                                      | -5,41E+03               | -1,10E+04                      | 1,02E+04                             | 4,29E+02                                            | -3,41E+01                        | -9,20E+02                               | -3,17E+03                                          | 4,69E+04                                     | 1,33E+03                                                       | -1,19E+02                                | -1,49E+03                                       | -1,46E+04                                                  | 2,47E+04  |
|    | AS2a | 5,93E+00  | 0,00E+00                    | 2,58E+03                                      | -5,41E+03               | -1,10E+04                      | 9,53E+03                             | 3,66E+02                                            | -3,70E+01                        | -9,97E+02                               | -3,20E+03                                          | 4,54E+04                                     | 1,13E+03                                                       | -1,34E+02                                | -1,67E+03                                       | -1,47E+04                                                  | 2,18E+04  |
|    | AS2b | 4,94E+00  | 0,00E+00                    | 2,25E+03                                      | -4,73E+03               | -9,65E+03                      | 1,27E+04                             | 4,98E+02                                            | -8,84E+01                        | -2,38E+03                               | -6,32E+03                                          | 5,49E+04                                     | 1,54E+03                                                       | -3,29E+02                                | -4,11E+03                                       | -2,40E+04                                                  | 2,02E+04  |
| ME | REF  | 1,75E+02  | 8,14E+03                    | 1,37E+03                                      | -4,35E+03               | -5,18E+03                      | 6,53E+04                             | 1,65E+02                                            | -2,15E+01                        | -3,39E+02                               | -7,17E+02                                          | 2,50E+05                                     | 4,97E+02                                                       | -7,68E+01                                | -5,60E+02                                       | -3,40E+03                                                  | 3,11E+05  |
|    | AS1  | 1,47E+02  | 7,88E+03                    | 1,34E+03                                      | -4,25E+03               | -5,06E+03                      | 6,58E+04                             | 2,04E+02                                            | -2,68E+01                        | -4,22E+02                               | -8,87E+02                                          | 2,52E+05                                     | 6,19E+02                                                       | -9,39E+01                                | -6,85E+02                                       | -3,71E+03                                                  | 3,13E+05  |
|    | AS2a | 1,70E+02  | 7,88E+03                    | 1,34E+03                                      | -4,25E+03               | -5,06E+03                      | 6,86E+04                             | 1,77E+02                                            | -2,91E+01                        | -4,58E+02                               | -1,06E+03                                          | 2,61E+05                                     | 5,34E+02                                                       | -1,05E+02                                | -7,68E+02                                       | -4,26E+03                                                  | 3,24E+05  |
|    | AS2b | 1,41E+02  | 6,46E+03                    | 1,16E+03                                      | -3,72E+03               | -4,43E+03                      | 8,25E+04                             | 2,41E+02                                            | -6,95E+01                        | -1,09E+03                               | -2,29E+03                                          | 3,03E+05                                     | 7,33E+02                                                       | -2,59E+02                                | -1,89E+03                                       | -7,97E+03                                                  | 3,72E+05  |

**Table S6** Detailed result from the LCIA of the four scenarios for the Stepwise impact categories Global Warming (GW), Human Toxicity carcinogens (HTc), Human Toxicity non-carcinogens (HTnc) and Eutrophication Aquatic (EA) in Euro2003.

|      |      | Transport | WtE-<br>Direct<br>emissions | WtE-Material<br>and energy<br>consumption | WtE-<br>Avoided<br>heat | WtE-<br>Avoided<br>electricity | WWTP<br>Egaa-<br>Direct<br>emissions | WWTP Egaa-<br>Material and<br>energy<br>consumption | WWTP<br>Egaa-<br>Avoided<br>heat | WWTP<br>Egaa-<br>Avoided<br>electricity | WWTP<br>Egaa-<br>Avoided<br>mineral<br>fertilizers | WWTP<br>Marselisborg-<br>Direct<br>emissions | WWTP<br>Marselisborg-<br>Material and<br>energy<br>consumption | WWTP<br>Marselisborg-<br>Avoided heat | WWTP<br>Marselisborg-<br>Avoided<br>electricity | WWTP<br>Marselisborg-<br>Avoided<br>mineral<br>fertilizers | Total     |
|------|------|-----------|-----------------------------|-------------------------------------------|-------------------------|--------------------------------|--------------------------------------|-----------------------------------------------------|----------------------------------|-----------------------------------------|----------------------------------------------------|----------------------------------------------|----------------------------------------------------------------|---------------------------------------|-------------------------------------------------|------------------------------------------------------------|-----------|
| GW   | REF  | 5,50E+04  | 7,65E+06                    | 7,20E+05                                  | -1,26E+07               | -2,62E+06                      | 8,86E+04                             | 7,67E+04                                            | -6,26E+04                        | -1,72E+05                               | -6,73E+04                                          | 2,93E+05                                     | 2,42E+05                                                       | -2,23E+05                             | -2,83E+05                                       | -3,08E+05                                                  | -7,25E+06 |
|      | AS1  | 4,64E+04  | 7,64E+06                    | 7,02E+05                                  | -1,24E+07               | -2,56E+06                      | 9,55E+04                             | 9,49E+04                                            | -7,79E+04                        | -2,14E+05                               | -8,10E+04                                          | 3,04E+05                                     | 3,00E+05                                                       | -2,73E+05                             | -3,47E+05                                       | -3,35E+05                                                  | -7,06E+06 |
|      | AS2a | 5,33E+04  | 7,64E+06                    | 7,02E+05                                  | -1,24E+07               | -2,56E+06                      | 9,18E+04                             | 8,24E+04                                            | -8,45E+04                        | -2,32E+05                               | -9,83E+04                                          | 2,88E+05                                     | 2,60E+05                                                       | -3,06E+05                             | -3,89E+05                                       | -3,91E+05                                                  | -7,30E+06 |
|      | AS2b | 4,45E+04  | 7,58E+06                    | 6,09E+05                                  | -1,08E+07               | -2,24E+06                      | 1,09E+05                             | 1,13E+05                                            | -2,02E+05                        | -5,54E+05                               | -2,15E+05                                          | 2,63E+05                                     | 3,56E+05                                                       | -7,52E+05                             | -9,55E+05                                       | -7,41E+05                                                  | -7,41E+06 |
| HTc  | REF  | 2,97E+02  | 5,66E+03                    | 1,21E+04                                  | -3,55E+06               | -2,62E+04                      | 9,89E-15                             | 1,28E+03                                            | -1,76E+04                        | -1,71E+03                               | -6,37E+04                                          | 7,88E-14                                     | 3,01E+03                                                       | -6,27E+04                             | -2,83E+03                                       | -3,92E+05                                                  | -4,09E+06 |
|      | AS1  | 2,51E+02  | 5,50E+03                    | 1,18E+04                                  | -3,47E+06               | -2,56E+04                      | 1,23E-14                             | 1,49E+03                                            | -2,19E+04                        | -2,13E+03                               | -9,59E+04                                          | 8,85E-14                                     | 3,66E+03                                                       | -7,66E+04                             | -3,46E+03                                       | -4,41E+05                                                  | -4,11E+06 |
|      | AS2a | 2,88E+02  | 5,50E+03                    | 1,18E+04                                  | -3,47E+06               | -2,56E+04                      | 1,23E-14                             | 1,34E+03                                            | -2,37E+04                        | -2,31E+03                               | -9,70E+04                                          | 8,85E-14                                     | 3,19E+03                                                       | -8,59E+04                             | -3,88E+03                                       | -4,44E+05                                                  | -4,13E+06 |
|      | AS2b | 2,41E+02  | 4,53E+03                    | 1,00E+04                                  | -3,04E+06               | -2,24E+04                      | 2,53E-14                             | 1,66E+03                                            | -5,67E+04                        | -5,53E+03                               | -1,92E+05                                          | 1,41E-13                                     | 4,17E+03                                                       | -2,11E+05                             | -9,53E+03                                       | -7,28E+05                                                  | -4,24E+06 |
| HTnc | REF  | 3,42E+02  | 1,91E+03                    | 2,61E+04                                  | -4,62E+05               | -1,11E+05                      | 8,12E+05                             | 3,29E+03                                            | -2,29E+03                        | -7,25E+03                               | -8,81E+05                                          | 4,68E+06                                     | 1,09E+04                                                       | -8,15E+03                             | -1,20E+04                                       | -5,47E+06                                                  | -1,42E+06 |
|      | AS1  | 2,88E+02  | 1,90E+03                    | 2,55E+04                                  | -4,51E+05               | -1,08E+05                      | 1,01E+06                             | 4,12E+03                                            | -2,85E+03                        | -9,02E+03                               | -1,33E+06                                          | 5,72E+06                                     | 1,35E+04                                                       | -9,97E+03                             | -1,46E+04                                       | -6,15E+06                                                  | -1,31E+06 |
|      | AS2a | 3,32E+02  | 1,90E+03                    | 2,55E+04                                  | -4,51E+05               | -1,08E+05                      | 1,10E+06                             | 3,63E+03                                            | -3,09E+03                        | -9,78E+03                               | -1,34E+06                                          | 6,39E+06                                     | 1,19E+04                                                       | -1,12E+04                             | -1,64E+04                                       | -6,17E+06                                                  | -5,82E+05 |
|      | AS2b | 2,77E+02  | 1,86E+03                    | 2,22E+04                                  | -3,95E+05               | -9,47E+04                      | 2,62E+06                             | 5,37E+03                                            | -7,38E+03                        | -2,34E+04                               | -2,64E+06                                          | 1,56E+07                                     | 1,74E+04                                                       | -2,75E+04                             | -4,03E+04                                       | -1,01E+07                                                  | 4,97E+06  |
| EA   | REF  | 3,20E+01  | 1,48E+03                    | 1,59E+02                                  | -6,17E+02               | -5,03E+02                      | 4,23E+04                             | 1,76E+01                                            | -3,06E+00                        | -3,30E+01                               | -7,29E+03                                          | 2,22E+05                                     | 5,07E+01                                                       | -1,09E+01                             | -5,44E+01                                       | -4,51E+04                                                  | 2,12E+05  |
|      | AS1  | 2,70E+01  | 1,43E+03                    | 1,55E+02                                  | -6,03E+02               | -4,92E+02                      | 5,54E+04                             | 2,14E+01                                            | -3,80E+00                        | -4,10E+01                               | -1,10E+04                                          | 2,42E+05                                     | 6,23E+01                                                       | -1,33E+01                             | -6,65E+01                                       | -5,07E+04                                                  | 2,36E+05  |
|      | AS2a | 3,11E+01  | 1,43E+03                    | 1,55E+02                                  | -6,03E+02               | -4,92E+02                      | 5,37E+04                             | 1,89E+01                                            | -4,12E+00                        | -4,45E+01                               | -1,11E+04                                          | 2,39E+05                                     | 5,44E+01                                                       | -1,49E+01                             | -7,46E+01                                       | -5,10E+04                                                  | 2,31E+05  |
|      | AS2b | 2,59E+01  | 1,18E+03                    | 1,33E+02                                  | -5,28E+02               | -4,31E+02                      | 6,92E+04                             | 2,54E+01                                            | -9,86E+00                        | -1,06E+02                               | -2,19E+04                                          | 2,85E+05                                     | 7,48E+01                                                       | -3,67E+01                             | -1,83E+02                                       | -8,34E+04                                                  | 2,49E+05  |

**Table S7.** Unit prices of market and non-market goods in the economic analysis

| <b>Market goods</b>                               | <b>Price</b>  | <b>Unit</b>                              |
|---------------------------------------------------|---------------|------------------------------------------|
| Electricity <sup>1</sup>                          | 0.38          | DKK/kWh                                  |
| Water <sup>2</sup>                                | 25            | DKK/m <sup>3</sup>                       |
| Heat <sup>2</sup>                                 | 44.6          | DKK/GJ                                   |
| Labour <sup>2</sup>                               | 374,400       | DKK/person/year                          |
| Transportation <sup>2</sup>                       | 15.22         | DKK/km                                   |
| Wastewater <sup>3</sup>                           | 30            | DKK/m <sup>3</sup> (paid by households). |
| Transportation cost <sup>4</sup>                  | 15.22         | DKK/km                                   |
| Biogas                                            | 1.8           | DKK/Nm <sup>3</sup>                      |
| Sludge                                            | 244           | DKK/ton                                  |
| Fertilizer N <sup>8</sup>                         | 8,775         | DKK/ton N                                |
| Fertilizer P <sup>8</sup>                         | 12,000        | DKK/ ton P                               |
| Grinder installation cost                         | 11,74         | DKK/item                                 |
| <b>Non-market goods (shadow prices)</b>           |               |                                          |
| CO <sub>2</sub> <sup>4</sup>                      | 115.83        | DKK/ton                                  |
| N <sub>2</sub> O <sup>5</sup>                     | 34,517.34     | DKK/ton                                  |
| CH <sub>4</sub> <sup>5</sup>                      | 2,895.75      | DKK/ton                                  |
| NO <sub>x</sub> <sup>6</sup>                      | 55            | DKK/ton                                  |
| N-leaching <sup>7</sup>                           | 40,000        | DKK/ton                                  |
| Cadmium <sup>10</sup>                             | 2,455         | DKK/ton                                  |
| <b>Tax and subsidy</b>                            |               |                                          |
| Subsidy for the electricity for sale <sup>2</sup> | 0.414         | DKK/kWh                                  |
| Subsidy for the heat for sale <sup>2</sup>        | 8.86          | DKK/GJ                                   |
| <b>Investment and Maintenance</b>                 |               |                                          |
| <i><b>Incineration</b></i>                        |               |                                          |
| Investment cost                                   | 900,000,000   | DKK                                      |
| Lifespan                                          | 30            | Years                                    |
| Maintenance cost                                  | 30,000,000    | DKK/year                                 |
| <i><b>Egaa WWTP (old)</b></i>                     |               |                                          |
| Investment cost                                   | 185,000,000   | DKK                                      |
| Lifespan                                          | 30            | Years                                    |
| Maintenance cost                                  | 2,200,000     | DKK/year                                 |
| <i><b>Marselisborg WWTP (old)</b></i>             |               |                                          |
| Investment cost                                   | 380,000,000   | DKK                                      |
| Lifespan                                          | 30            | Years                                    |
| Maintenance cost                                  | 3,800,000     | DKK/year                                 |
| <i><b>Egaa WWTP (new)</b></i>                     |               |                                          |
| Investment cost                                   | 80,000,000    | DKK                                      |
| Lifespan                                          | 30            | Years                                    |
| Maintenance cost                                  | 619,000       | DKK/year                                 |
| <i><b>Marselisborg WWTP (new)</b></i>             |               |                                          |
| Investment cost                                   | 1,600,000,000 | DKK                                      |
| Lifespan                                          | 30            | Years                                    |
| Maintenance cost                                  | 16,000,000    | DKK/year                                 |

<sup>1</sup>Eurostat<sup>2</sup> AarhusVand, 2015; <sup>3</sup>Pizzol et al., 2013; <sup>4</sup>Energinet, 2013; <sup>5</sup>EPA, Emission Factors for Greenhouse Gas Inventories, 2014; <sup>6</sup>Energistyrelsen, 2010; <sup>7</sup>Jacobsen et al., 2009; <sup>8</sup>Jensen et al., 2015; <sup>9</sup>NATIONS, F.A.A.O.T.U., 2015; <sup>10</sup>Pizzol et al., 2014

A noteworthy factor is the maintenance and discounted investment costs of new Egaa plant are less than the old one

**Table S8:** The fixed cost of eight plants [mill DKK].

|                                               | REF-<br>Marseliborg | REF-Egaa | AS1-<br>Marseliborg | AS1-Egaa | AS2-<br>Marseliborg | AS2-<br>Egaa | AS2b-<br>Marseliborg | AS2b-<br>Egaa |
|-----------------------------------------------|---------------------|----------|---------------------|----------|---------------------|--------------|----------------------|---------------|
| Investment<br>cost (DKK)                      | 1600                | 185      | 1600                | 80       | 1600                | 80           | 1600                 | 80            |
| Lifetime<br>(year)                            | 30                  | 30       | 30                  | 30       | 30                  | 30           | 30                   | 30            |
| Interest costs<br>(DKK)                       | 80                  | 9.25     | 80                  | 4        | 80                  | 4            | 80                   | 4             |
| Depreciation<br>cost (DKK)                    | 53.3                | 6.2      | 53.3                | 2.7      | 53.3                | 2.7          | 53.3                 | 2.7           |
| Operation<br>and<br>maintenance<br>cost (DKK) | 9                   | 2        | 9237                | 6        | 9142                | 0.6          | 9145                 | 0.6           |

**Table S9:** Shadow prices of environmental outputs, [DKK/ton].

|                                                  |           |
|--------------------------------------------------|-----------|
| <b>Emission to air</b>                           |           |
| CH <sub>4</sub>                                  | 2,896     |
| N <sub>2</sub> O, indirect                       | 34,517    |
| N <sub>2</sub> O, direct                         | 34,517    |
| <b>Emission to surface water from wastewater</b> |           |
| Nitrite+nitrate-N                                | 40,000    |
| <b>Emission to soil</b>                          |           |
| Cadmium                                          | 2,455,000 |

**Figure S1.** Structure of costs for WWTPs in different scenarios

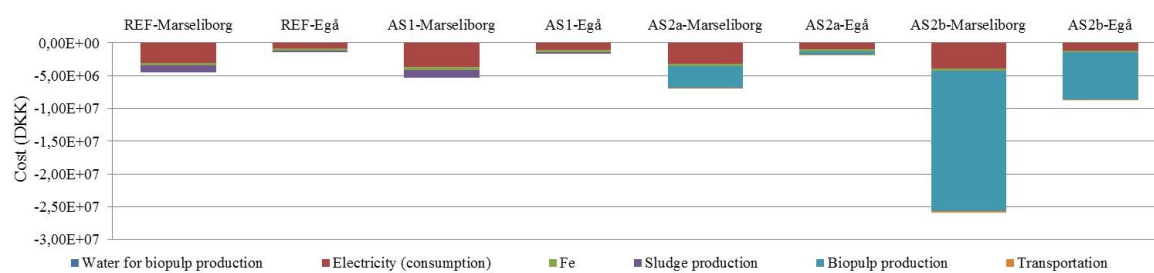

**Figure S2.** Structure of revenues for WWTPs in different scenarios.

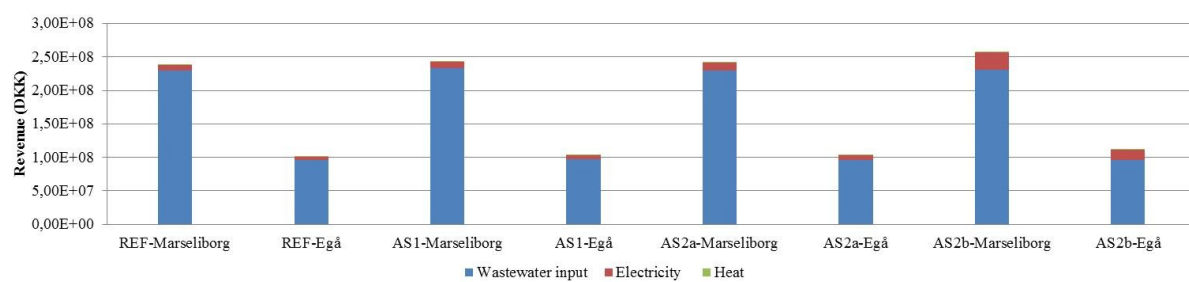

**Figure S3.** Return on Investment as function of the amount of external carbon in the ingestate at Marselisborg WWTP.

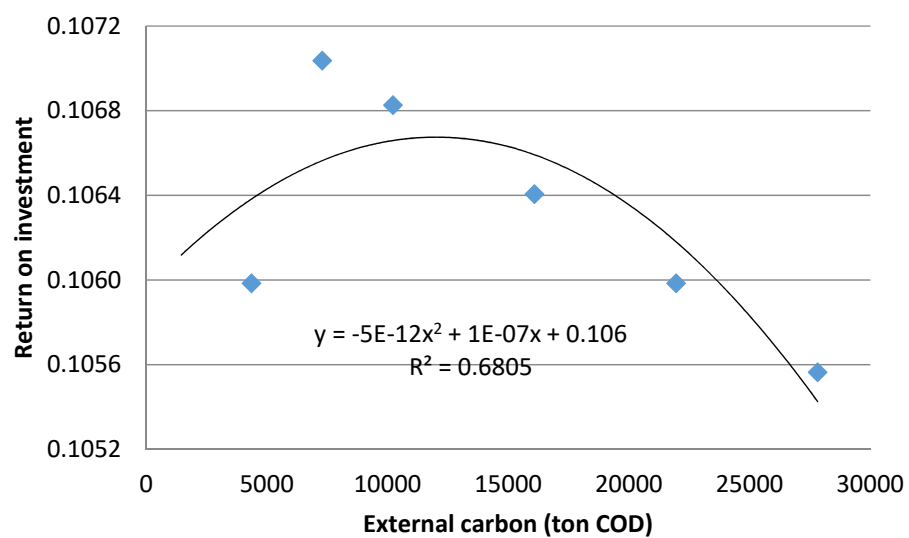



**Figure S4.** Return on Investment as function of the amount of external carbon in the ingestate at Egaa WWTP.

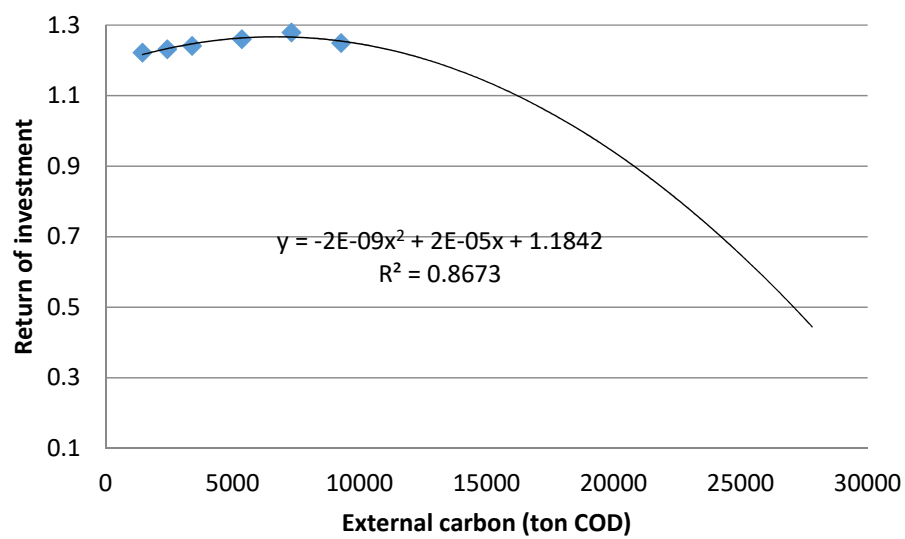

Figure S5. Energy outputs of different external carbon inputs.

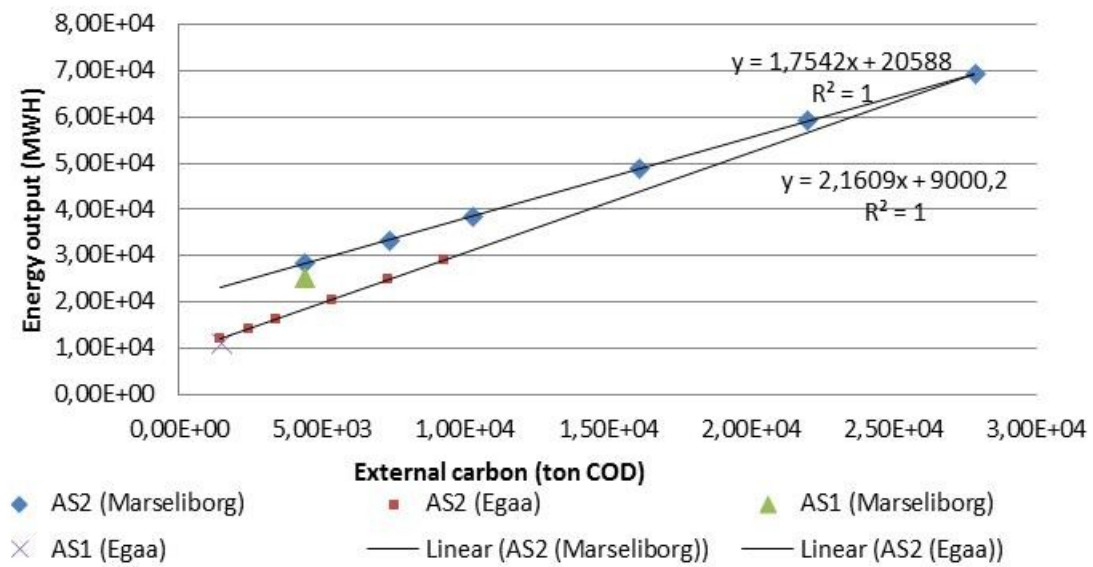

**Figure S6.** Farmers' benefit structure in the different scenarios.

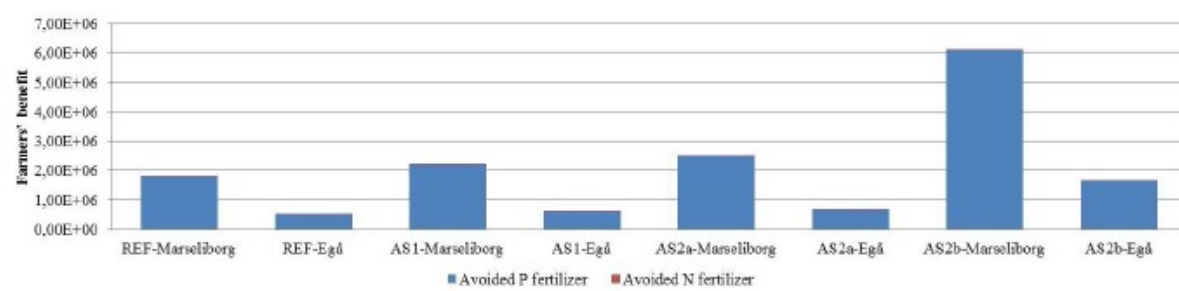

**Figure S7.** Social benefit structure of WWTPs in the different scenarios.

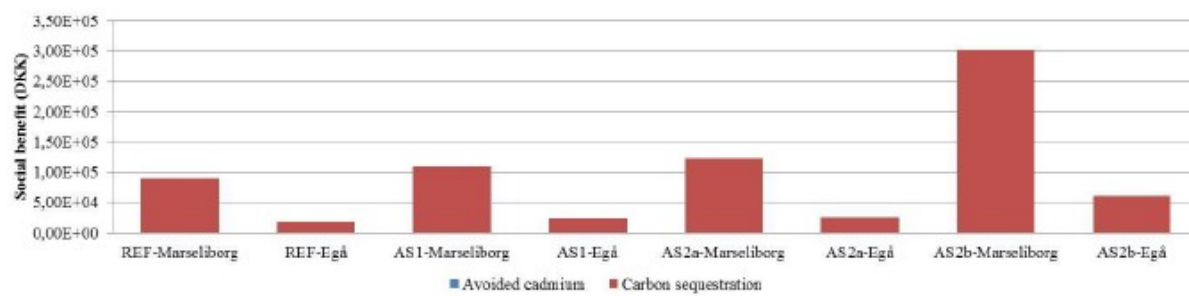

**Figure S8.** Social cost structure of WWTPs in the different scenarios.

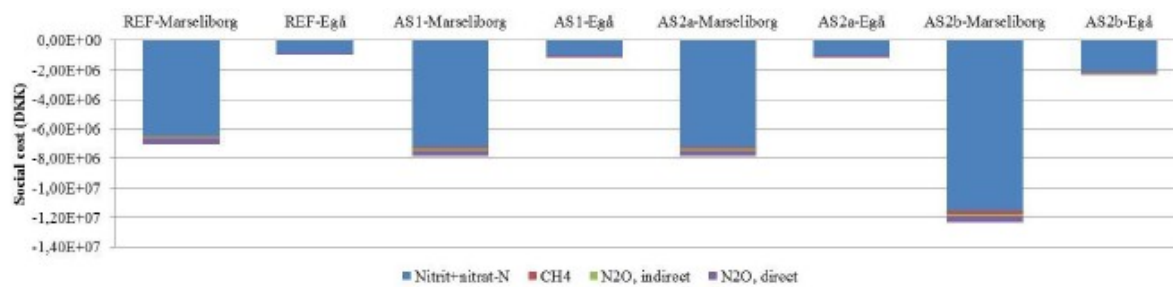

**Figure S9.** Radar graph of system level environmental performances for the reference and alternative scenarios (aggregated visualization of total results in Figure 4a-f) together with the whole benefit; i.e. net revenue. All value normalised in the range 0-1.

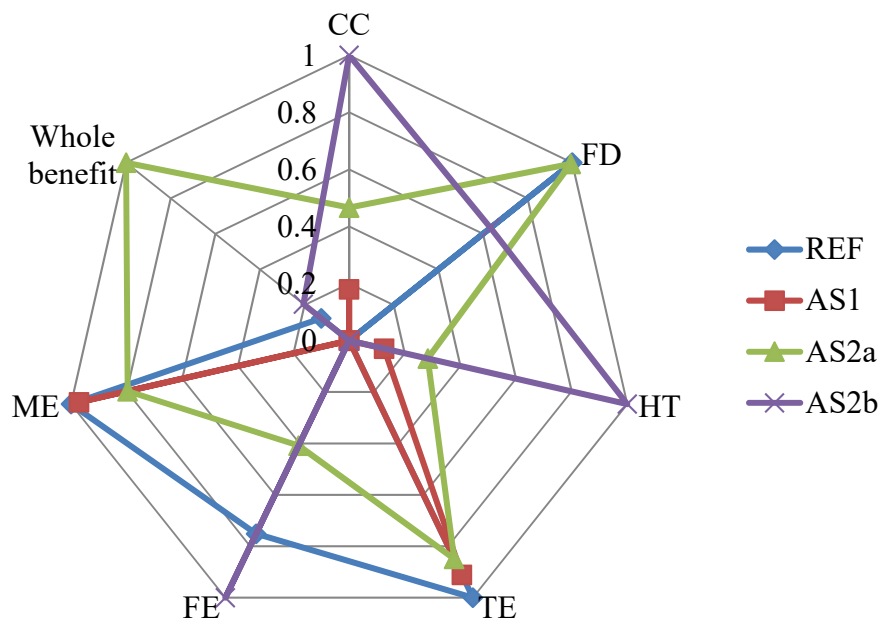

**Figure S10:** Radar graph of economic performances of Marselisborg (a) and Egaa (b) in different scenarios.

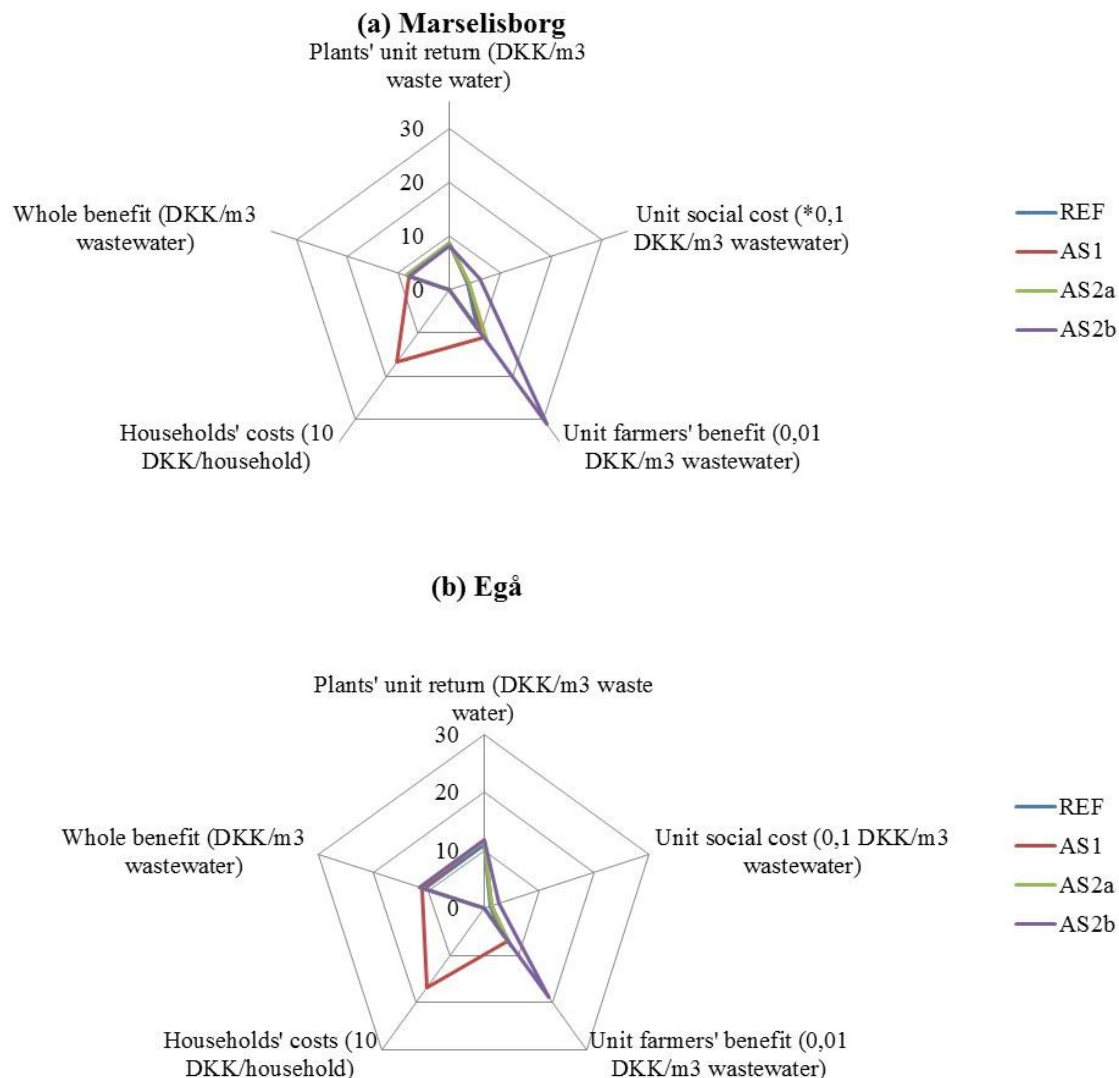

Concerning the cost-benefit performance, our analysis has revealed that the Marselisborg WWTP shows the largest return on investment in AS1, while Egaa shows largest return on investment in the AS2b (Supplementary Materials, Figure S10). The main reason for this difference between the two WWTPs is that the amount of final sludge produced in AS1 is less compared to the AS2 scenarios due to around 30% of the organic matter is removed in the aerobic biotank in AS1. Secondary, in the calculation setup of the presented analysis, Marselisborg WWTP receives a higher amount of external carbon compared to Egaa WWTP.

## References

- AarhusVand, 2015. Business plan 2015 of AarhusVand Available at: <http://www.vpu-aarhus.dk/globalassets/filer/om-os/publikationer/business-plan-2015.pdf>
- Energinet, 2013. Energinet.dk's analysis assumptions 2013-2035. Available at: <http://energinet.dk/>
- Energistyrelsen, 2011. Presumptions for socioeconomic analysis within the energy sector, "in Danish". Available at <http://www.ens.dk/>
- Eurostat. Available at: <http://ec.europa.eu/eurostat/data/database>
- Jacobsen, B.H., B. Hasler, and L.B. Hansen, 2009. Economic midterm evaluation of the Water action plan III, 41 pp
- Mogensen, L., Kristensen, T., Nguyen, T.L.T., Knudsen, M.T., Hermansen, J.E., 2014. Method for calculating carbon footprint of cattle feeds – including contribution from soil carbon changes and use of cattle manure. *J. Clean. Prod.* 73, pp 40-51.
- NATIONS, F.A.A.O.O.T.U., 2015. World fertilizer trends and outlook to 2018.
- Nielsen, O.-K., Plejdrup, M.S., Winther, M., Nielsen, M., Gyldenkerne, S., Mikkelsen, M.H., Albrektsen, R., Thomsen, M., Hjelgaard, K., Fauser, P., Bruun, H.G., Johannsen, V.K., Nord-Larsen, T., Vesterdal, L., Møller, I.S., Caspersen, O.H., Rasmussen, E., Petersen, S.B., Baunbæk, L. & Hansen, M.G. 2015. Denmark's National Inventory Report 2015. Emission Inventories 1990-2013 - Submitted under the United Nations Framework Convention on Climate Change and the Kyoto Protocol. Aarhus University, DCE – Danish Centre for Environment and Energy, 911pp. Scientific Report from DCE –Danish Centre for Environment and Energy. <http://dce2.au.dk/pub/SR171.pdf>
- Niero, M., Pizzol, M., Bruun, H.G., Thomsen, M., 2014. Comparative life cycle assessment of wastewater treatment in Denmark including sensitivity and uncertainty analysis. *Journal of Cleaner Production*, 68, pp 25-35.
- Petersen, B.M., Knudsen, M.T., Hermansen, J.E., Halberg, N., 2013. An approach to include soil carbon changes in life cycle assessments. *J. Clean. Prod.* 52, pp 217-224.
- Pizzol, M., Scotti, M., Thomsen, M., 2013. Network analysis as a tool for assessing environmental sustainability: applying the ecosystem perspective to a Danish water management system. *Journal of Environmental Management* 118, pp 21-31.
- Riber, C., Petersen, C., Christensen, T.H., 2009. Chemical composition of material fractions in Danish household waste. *Waste Management* 29, pp 1251-1257
- Seghetta, M., Romeo, D., D'Este, M., Alvarado-Morales, M., Angelidaki, I., Bastianoni S., Thomsen, M., 2016. Seaweed as innovative feedstock for energy and feed – evaluating the impacts through a Life Cycle Assessment. Submitted to *Journal of Cleaner Production*
- Thomsen, M. 2014. Wastewater treatment and discharge. Aarhus University, DCE – Danish Centre for Environment and Energy, 79 pp. Scientific Report from DCE – Danish Centre for Environment and Energy No. 193 <http://www.dmu.dk/Pub/SR193.pdf>
- Vestforbrænding, 2011. Grønt regnskab, p. 26 [In English: Green Accounts], I/S Vestforbrænding, Ejby Mosevej 219, 2600 Glostrup. [www.vestfor.dk](http://www.vestfor.dk).
